# Supplementary material for: The interplay of family history of depression and early trauma: associations with lifetime and current depression in the German national cohort (NAKO)
Source: Front Epidemiol. 2023 May 23;3:1099235. doi: 10.3389/fepid.2023.1099235 (PMC10959537; doi:10.3389/fepid.2023.1099235)
Supplement: Supplementary file 1 [file Table1.xlsx]

## Sheet: Abbreviation registry
Abbreviation	Desciption
fam_hist_mdd_mv_count	Family history of depression
basis_age	Age
I(basis_age^2)	Age squared
basis_sex_factor	Gender
isced97_level3c_fac	Education level
StudZ_fac	Study center

## Sheet: S1_FH_CTS1_Emo_neglect_fac
	Emotional neglect by FH (number of affected parents)
formula:	CTS1_Emo_neglect_fac ~ fam_hist_mdd_mv_count + basis_age + I(basis_age^2) + basis_sex_factor + isced97_level3c_fac + StudZ_fac
	Estimate	Std. Error	z value	Pr(>|z|)	Odds Ratio (OR)	OR 95% CI Lower	OR 95% CI Higher
(Intercept)	-6.34028	0.360118	-17.6061	2.20994e-69	0.0017638	0.000862274	0.00353879
fam_hist_mdd_mv_countFH one parent positive	0.455568	0.0420778	10.8268	2.56913e-27	1.57707	1.45153	1.71186
fam_hist_mdd_mv_countFH both parents positive	1.19587	0.0823721	14.5179	9.33761e-48	3.30642	2.80671	3.87703
basis_age	0.152096	0.0136839	11.115	1.06076e-28	1.16427	1.13382	1.19631
I(basis_age^2)	-0.0012072	0.000132176	-9.1333	6.64404e-20	0.998794	0.998532	0.99905
basis_sex_factorfemale	0.220233	0.0353981	6.22161	4.92085e-10	1.24637	1.16296	1.33608
isced97_level3c_facIntermediate	-0.950056	0.0912369	-10.4131	2.16123e-25	0.386719	0.324206	0.463697
isced97_level3c_facHigher	-1.31435	0.091789	-14.3192	1.65929e-46	0.268649	0.224973	0.322465
Study center: Regensburg	-0.0124539	0.0956045	-0.130265	0.896357	0.987623	0.81726	1.18909
Study center: Mannheim	0.0235917	0.0968372	0.243622	0.807524	1.02387	0.84513	1.23561
Study center: Freiburg	-0.0642506	0.096722	-0.664281	0.50651	0.93777	0.774213	1.13142
Study center: Saarbrücken	-0.0179524	0.0928958	-0.193253	0.846761	0.982208	0.817346	1.17663
Study center: Essen	0.126553	0.0924688	1.36861	0.171122	1.13491	0.945287	1.35853
Study center: Münster	-0.0476186	0.0928735	-0.512725	0.608144	0.953497	0.793481	1.14218
Study center: Düsseldorf	0.173105	0.105546	1.6401	0.100985	1.18899	0.963941	1.45837
Study center: Halle	-0.22282	0.104655	-2.12909	0.0332469	0.800259	0.64982	0.979719
Study center: Leipzig	-0.082666	0.0838179	-0.986257	0.324007	0.920659	0.780559	1.08433
Study center: Berlin Nord	-0.197628	0.095758	-2.06382	0.0390345	0.820675	0.678859	0.988326
Study center: Berlin Mitte	0.0636808	0.0858296	0.741944	0.458121	1.06575	0.899904	1.26002
Study center: Berlin Süd	0.121817	0.0911415	1.33656	0.181365	1.12955	0.943439	1.34882
Study center: Hannover	0.116596	0.0909508	1.28197	0.199854	1.12367	0.938858	1.34127
Study center: Hamburg	0.0525845	0.0951519	0.552638	0.580512	1.05399	0.873034	1.26798
Study center: Bremen	0.313624	0.0814108	3.85236	0.000116985	1.36837	1.166	1.60452
Study center: Kiel	0.0396966	0.0954578	0.415855	0.677516	1.0405	0.861284	1.25243
Study center: Neubrandenburg	-0.275422	0.0849391	-3.24259	0.0011845	0.759251	0.642203	0.89607
	Df	Chisq	Pr(>Chisq)
(Intercept)	1	309.976	2.20994e-69
fam_hist_mdd_mv_count	2	293.334	2.01056e-64
basis_age	1	123.543	1.06076e-28
I(basis_age^2)	1	83.4172	6.64404e-20
basis_sex_factor	1	38.7084	4.92085e-10
isced97_level3c_fac	2	258.902	6.02853e-57
StudZ_fac	17	71.6302	1.12802e-08

## Sheet: S2_FH_CTS2_Phys_abuse_fac
	Physical abuse by FH (number of affected parents)
formula:	CTS2_Phys_abuse_fac ~ fam_hist_mdd_mv_count + basis_age + I(basis_age^2) + basis_sex_factor + isced97_level3c_fac + StudZ_fac
	Estimate	Std. Error	z value	Pr(>|z|)	Odds Ratio (OR)	OR 95% CI Lower	OR 95% CI Higher
(Intercept)	-4.50494	0.31287	-14.3987	5.26925e-47	0.0110542	0.00594552	0.0202727
fam_hist_mdd_mv_countFH one parent positive	0.488944	0.040512	12.0691	1.53765e-33	1.63059	1.50546	1.76459
fam_hist_mdd_mv_countFH both parents positive	1.23324	0.0801874	15.3795	2.24796e-53	3.43233	2.92654	4.00805
basis_age	0.081707	0.0118983	6.86714	6.55037e-12	1.08514	1.06036	1.11099
I(basis_age^2)	-0.000550343	0.00011654	-4.72235	2.33141e-06	0.99945	0.99922	0.999676
basis_sex_factorfemale	-0.186096	0.0334161	-5.56906	2.56111e-08	0.830194	0.777558	0.886388
isced97_level3c_facIntermediate	-0.690727	0.0968554	-7.13153	9.92586e-13	0.501211	0.415913	0.608148
isced97_level3c_facHigher	-1.0635	0.0971503	-10.947	6.87011e-28	0.345245	0.286317	0.419137
Study center: Regensburg	-0.123597	0.096398	-1.28215	0.199789	0.883736	0.729935	1.06536
Study center: Mannheim	0.103362	0.0925017	1.1174	0.263823	1.10889	0.923412	1.32727
Study center: Freiburg	-0.0332902	0.0935018	-0.356038	0.721812	0.967258	0.803765	1.15984
Study center: Saarbrücken	0.0588753	0.0892729	0.659498	0.509576	1.06064	0.889106	1.26186
Study center: Essen	0.285625	0.0867812	3.29132	0.000997167	1.33059	1.1212	1.57576
Study center: Münster	-0.0596769	0.0906259	-0.658497	0.510219	0.942069	0.787486	1.12359
Study center: Düsseldorf	0.0547463	0.106876	0.512242	0.608482	1.05627	0.853781	1.29849
Study center: Halle	-0.0527504	0.0962104	-0.548282	0.583498	0.948617	0.78384	1.1432
Study center: Leipzig	-0.032508	0.0804195	-0.40423	0.686044	0.968015	0.826324	1.13269
Study center: Berlin Nord	0.0761745	0.0868016	0.87757	0.380177	1.07915	0.909241	1.27797
Study center: Berlin Mitte	0.0780091	0.0833806	0.935579	0.34949	1.08113	0.917344	1.27216
Study center: Berlin Süd	0.163062	0.0880909	1.85107	0.0641599	1.17711	0.989212	1.39742
Study center: Hannover	0.166921	0.0872612	1.91289	0.0557624	1.18166	0.994697	1.4006
Study center: Hamburg	-0.00782895	0.0943851	-0.0829469	0.933894	0.992202	0.823006	1.19173
Study center: Bremen	0.206405	0.0813134	2.53839	0.0111363	1.22925	1.04747	1.44087
Study center: Kiel	0.0378771	0.0933549	0.405732	0.684939	1.0386	0.86332	1.24506
Study center: Neubrandenburg	-0.10719	0.0788958	-1.35863	0.174263	0.898355	0.769248	1.04817
	Df	Chisq	Pr(>Chisq)
(Intercept)	1	207.324	5.26925e-47
fam_hist_mdd_mv_count	2	341.49	7.02004e-75
basis_age	1	47.1576	6.55037e-12
I(basis_age^2)	1	22.3005	2.33141e-06
basis_sex_factor	1	31.0145	2.56111e-08
isced97_level3c_fac	2	201.742	1.55683e-44
StudZ_fac	17	43.7107	0.000377795

## Sheet: S3_FH_CTS3_Emo_abuse_fac
	Emotional abuse by FH (number of affected parents)
formula:	CTS3_Emo_abuse_fac ~ fam_hist_mdd_mv_count + basis_age + I(basis_age^2) + basis_sex_factor + isced97_level3c_fac + StudZ_fac
	Estimate	Std. Error	z value	Pr(>|z|)	Odds Ratio (OR)	OR 95% CI Lower	OR 95% CI Higher
(Intercept)	-3.68653	0.276856	-13.3157	1.8757e-40	0.0250587	0.0144987	0.0429245
fam_hist_mdd_mv_countFH one parent positive	0.657255	0.0398703	16.4848	4.71633e-61	1.92949	1.7838	2.08559
fam_hist_mdd_mv_countFH both parents positive	1.40601	0.0772147	18.2092	4.36581e-74	4.07966	3.49994	4.7377
basis_age	0.055453	0.0108016	5.13378	2.8398e-07	1.05702	1.03502	1.07979
I(basis_age^2)	-0.000573661	0.000110716	-5.18139	2.20244e-07	0.999427	0.999208	0.999642
basis_sex_factorfemale	0.533469	0.0363724	14.6669	1.05106e-48	1.70484	1.5879	1.83125
isced97_level3c_facIntermediate	-0.616775	0.102319	-6.02795	1.66055e-09	0.539682	0.443325	0.662299
isced97_level3c_facHigher	-0.93664	0.10259	-9.12995	6.85334e-20	0.391942	0.321788	0.481239
Study center: Regensburg	-0.11276	0.100285	-1.1244	0.260845	0.893365	0.732201	1.08511
Study center: Mannheim	-0.140233	0.103452	-1.35554	0.175247	0.869156	0.707709	1.06195
Study center: Freiburg	0.0962175	0.0934378	1.02975	0.303128	1.101	0.915357	1.32053
Study center: Saarbrücken	0.0467595	0.0931411	0.502028	0.615647	1.04787	0.871698	1.25608
Study center: Essen	0.084515	0.0959238	0.881064	0.378283	1.08819	0.900049	1.31119
Study center: Münster	0.0547597	0.0905388	0.60482	0.545298	1.05629	0.883436	1.26005
Study center: Düsseldorf	0.0511018	0.110877	0.460889	0.644878	1.05243	0.843873	1.30376
Study center: Halle	-0.0859699	0.100332	-0.856858	0.391523	0.917622	0.752024	1.11469
Study center: Leipzig	-0.00700703	0.082821	-0.0846044	0.932576	0.993017	0.843781	1.16758
Study center: Berlin Nord	-0.0718356	0.0949228	-0.75678	0.449182	0.930684	0.77134	1.11928
Study center: Berlin Mitte	0.207318	0.0836506	2.47838	0.0131981	1.23037	1.04377	1.449
Study center: Berlin Süd	0.19662	0.0919054	2.13937	0.0324057	1.21728	1.01529	1.45591
Study center: Hannover	0.123393	0.0909338	1.35695	0.174796	1.13133	0.945446	1.35059
Study center: Hamburg	0.114919	0.095911	1.19818	0.230845	1.12178	0.92788	1.35166
Study center: Bremen	0.110766	0.0844917	1.31097	0.189867	1.11713	0.946037	1.31768
Study center: Kiel	0.0708464	0.0966492	0.733027	0.463542	1.07342	0.886496	1.29513
Study center: Neubrandenburg	-0.248058	0.0840093	-2.95274	0.00314969	0.780315	0.661395	0.919484
	Df	Chisq	Pr(>Chisq)
(Intercept)	1	177.308	1.8757e-40
fam_hist_mdd_mv_count	2	528.198	2.01006e-115
basis_age	1	26.3557	2.8398e-07
I(basis_age^2)	1	26.8468	2.20244e-07
basis_sex_factor	1	215.117	1.05106e-48
isced97_level3c_fac	2	140.003	3.96954e-31
StudZ_fac	17	49.0749	5.8728e-05

## Sheet: S4_FH_CTS4_Sex_abuse_fac
	Sexual abuse by FH (number of affected parents)
formula:	CTS4_Sex_abuse_fac ~ fam_hist_mdd_mv_count + basis_age + I(basis_age^2) + basis_sex_factor + isced97_level3c_fac + StudZ_fac
	Estimate	Std. Error	z value	Pr(>|z|)	Odds Ratio (OR)	OR 95% CI Lower	OR 95% CI Higher
(Intercept)	-5.78001	0.333569	-17.3278	2.90414e-67	0.00308869	0.0015949	0.00589802
fam_hist_mdd_mv_countFH one parent positive	0.563879	0.0441398	12.7748	2.2667e-37	1.75748	1.61108	1.91545
fam_hist_mdd_mv_countFH both parents positive	1.21889	0.0864228	14.1038	3.59953e-45	3.38343	2.84873	3.99816
basis_age	0.0916597	0.0128096	7.15553	8.33516e-13	1.09599	1.06906	1.12412
I(basis_age^2)	-0.000833036	0.000128941	-6.46061	1.0428e-10	0.999167	0.998913	0.999418
basis_sex_factorfemale	1.35315	0.0476645	28.389	2.76739e-177	3.86958	3.52724	4.25206
isced97_level3c_facIntermediate	-0.551414	0.112566	-4.89858	9.65312e-07	0.576135	0.464271	0.722099
isced97_level3c_facHigher	-0.712388	0.112917	-6.30896	2.80921e-10	0.490472	0.394963	0.615145
Study center: Regensburg	0.0674814	0.107407	0.628276	0.529823	1.06981	0.864753	1.31791
Study center: Mannheim	0.251859	0.103448	2.43464	0.0149067	1.28642	1.04856	1.57334
Study center: Freiburg	0.376526	0.0973092	3.86937	0.000109115	1.45721	1.20302	1.76209
Study center: Saarbrücken	-0.0227836	0.105877	-0.215189	0.82962	0.977474	0.792623	1.20074
Study center: Essen	0.144012	0.105308	1.36753	0.171461	1.1549	0.937662	1.41728
Study center: Münster	0.0725302	0.101366	0.715527	0.474283	1.07523	0.880146	1.30989
Study center: Düsseldorf	-0.0632236	0.128108	-0.493519	0.621646	0.938734	0.72657	1.20125
Study center: Halle	-0.337334	0.121202	-2.78324	0.00538189	0.71367	0.560372	0.90165
Study center: Leipzig	-0.151442	0.0959658	-1.57808	0.114546	0.859468	0.711408	1.03655
Study center: Berlin Nord	-0.23925	0.109551	-2.18392	0.028968	0.787218	0.633461	0.973586
Study center: Berlin Mitte	0.176738	0.0937487	1.88523	0.0593989	1.19332	0.992392	1.4334
Study center: Berlin Süd	0.304765	0.0988121	3.08429	0.00204039	1.35631	1.11627	1.6447
Study center: Hannover	0.0314536	0.104273	0.301647	0.762921	1.03195	0.839632	1.26395
Study center: Hamburg	0.236167	0.103713	2.27713	0.0227786	1.26639	1.03165	1.54958
Study center: Bremen	0.281987	0.0910904	3.09568	0.00196362	1.32576	1.10859	1.58461
Study center: Kiel	0.0703189	0.107786	0.652392	0.514148	1.07285	0.866543	1.3226
Study center: Neubrandenburg	-0.46126	0.100364	-4.59585	4.30981e-06	0.630489	0.517082	0.766552
	Df	Chisq	Pr(>Chisq)
(Intercept)	1	300.251	2.90414e-67
fam_hist_mdd_mv_count	2	318.23	7.89145e-70
basis_age	1	51.2016	8.33516e-13
I(basis_age^2)	1	41.7395	1.0428e-10
basis_sex_factor	1	805.933	2.76739e-177
isced97_level3c_fac	2	48.7459	2.59992e-11
StudZ_fac	17	133.166	4.59656e-20

## Sheet: S5_FH_CTS5_Phys_neglect_fac
	Physical neglect by FH (number of affected parents)
formula:	CTS5_Phys_neglect_fac ~ fam_hist_mdd_mv_count + basis_age + I(basis_age^2) + basis_sex_factor + isced97_level3c_fac + StudZ_fac
	Estimate	Std. Error	z value	Pr(>|z|)	Odds Ratio (OR)	OR 95% CI Lower	OR 95% CI Higher
(Intercept)	-4.80089	0.287709	-16.6866	1.64033e-62	0.00822239	0.00465034	0.0143665
fam_hist_mdd_mv_countFH one parent positive	-0.0325214	0.0388969	-0.836091	0.403104	0.968002	0.896489	1.04417
fam_hist_mdd_mv_countFH both parents positive	0.0773308	0.0989482	0.781528	0.434492	1.0804	0.885803	1.30597
basis_age	0.0933123	0.0107803	8.65584	4.89307e-18	1.0978	1.07506	1.12147
I(basis_age^2)	-0.000527553	0.000103899	-5.07757	3.82291e-07	0.999473	0.999268	0.999675
basis_sex_factorfemale	-0.0956558	0.0283312	-3.37635	0.000734557	0.908777	0.859694	0.960676
isced97_level3c_facIntermediate	-0.695812	0.0857405	-8.11533	4.84476e-16	0.498669	0.422431	0.591288
isced97_level3c_facHigher	-1.07907	0.0860179	-12.5447	4.2524e-36	0.339913	0.287786	0.403259
Study center: Regensburg	-0.0778975	0.0832463	-0.935747	0.349403	0.925059	0.784616	1.08752
Study center: Mannheim	0.10195	0.0817411	1.24724	0.212311	1.10733	0.942179	1.29821
Study center: Freiburg	0.141286	0.0789702	1.78911	0.0735978	1.15175	0.985547	1.34328
Study center: Saarbrücken	-0.139151	0.0828486	-1.67958	0.0930386	0.870097	0.738585	1.02212
Study center: Essen	0.170881	0.078589	2.17436	0.0296778	1.18635	1.01596	1.38266
Study center: Münster	0.0950711	0.0771646	1.23206	0.217928	1.09974	0.944484	1.27822
Study center: Düsseldorf	0.147475	0.0919009	1.60472	0.108555	1.1589	0.965769	1.38488
Study center: Halle	0.166951	0.0786957	2.12148	0.0338813	1.1817	1.01174	1.37749
Study center: Leipzig	0.173219	0.0670207	2.58455	0.00975056	1.18913	1.04256	1.35589
Study center: Berlin Nord	0.148335	0.0740853	2.00223	0.0452605	1.1599	1.00246	1.34038
Study center: Berlin Mitte	0.126315	0.072624	1.7393	0.0819822	1.13464	0.983535	1.30756
Study center: Berlin Süd	0.0195775	0.0803316	0.243709	0.807456	1.01977	0.870171	1.19238
Study center: Hannover	0.116662	0.0781846	1.49214	0.135663	1.12374	0.963105	1.30865
Study center: Hamburg	0.189843	0.0789568	2.40439	0.0161994	1.20906	1.03464	1.41011
Study center: Bremen	0.214661	0.0719888	2.98187	0.00286493	1.23944	1.07578	1.42663
Study center: Kiel	0.241044	0.0777159	3.1016	0.00192477	1.27258	1.09176	1.48073
Study center: Neubrandenburg	0.370219	0.0626199	5.91216	3.37648e-09	1.44805	1.28097	1.63743
	Df	Chisq	Pr(>Chisq)
(Intercept)	1	278.443	1.64033e-62
fam_hist_mdd_mv_count	2	1.4054	0.495245
basis_age	1	74.9235	4.89307e-18
I(basis_age^2)	1	25.7817	3.82291e-07
basis_sex_factor	1	11.3997	0.000734557
isced97_level3c_fac	2	282.371	4.82896e-62
StudZ_fac	17	73.9299	4.49356e-09

## Sheet: S6_FH_CTS_any_maltreatment_fac
	Maltreatment by FH (number of affected parents)
formula:	CTS_any_maltreatment_fac ~ fam_hist_mdd_mv_count + basis_age + I(basis_age^2) + basis_sex_factor + isced97_level3c_fac + StudZ_fac
	Estimate	Std. Error	z value	Pr(>|z|)	Odds Ratio (OR)	OR 95% CI Lower	OR 95% CI Higher
(Intercept)	-3.05077	0.176667	-17.2684	8.13496e-67	0.0473227	0.0334243	0.0668095
fam_hist_mdd_mv_countFH one parent positive	0.383281	0.0253725	15.1062	1.47478e-51	1.46709	1.39579	1.54175
fam_hist_mdd_mv_countFH both parents positive	1.00966	0.0613331	16.4619	6.88513e-61	2.74467	2.43321	3.0947
basis_age	0.073786	0.00662223	11.1422	7.81898e-29	1.07658	1.06274	1.09069
I(basis_age^2)	-0.000481436	6.60179e-05	-7.29252	3.04221e-13	0.999519	0.999389	0.999648
basis_sex_factorfemale	0.186237	0.0200093	9.30751	1.30869e-20	1.20471	1.15839	1.25291
isced97_level3c_facIntermediate	-0.660133	0.0703418	-9.38464	6.31321e-21	0.516783	0.45036	0.5934
isced97_level3c_facHigher	-0.973213	0.0702818	-13.8473	1.3209e-43	0.377867	0.329339	0.433839
Study center: Regensburg	-0.00138751	0.056354	-0.0246214	0.980357	0.998613	0.893838	1.11483
Study center: Mannheim	0.0873475	0.056982	1.5329	0.125301	1.09128	0.975593	1.2198
Study center: Freiburg	0.179546	0.0544239	3.29903	0.000970184	1.19667	1.07532	1.33106
Study center: Saarbrücken	-0.0033588	0.0551759	-0.0608743	0.951459	0.996647	0.89419	1.11013
Study center: Essen	0.16409	0.055435	2.96004	0.003076	1.17832	1.05669	1.31321
Study center: Münster	0.0759057	0.0528667	1.43579	0.151061	1.07886	0.972424	1.19637
Study center: Düsseldorf	0.12552	0.0640049	1.96109	0.0498682	1.13374	0.999445	1.28452
Study center: Halle	-0.0547324	0.0564155	-0.970166	0.331964	0.946738	0.847263	1.057
Study center: Leipzig	0.0248244	0.0473176	0.524634	0.599838	1.02514	0.934257	1.12467
Study center: Berlin Nord	-0.0192024	0.0530333	-0.362082	0.717291	0.980981	0.883889	1.08816
Study center: Berlin Mitte	0.146459	0.0498508	2.93795	0.00330386	1.15773	1.04982	1.2764
Study center: Berlin Süd	0.114121	0.054583	2.09078	0.0365477	1.12089	1.00689	1.24713
Study center: Hannover	0.102709	0.0538364	1.90779	0.0564178	1.10817	0.99692	1.23118
Study center: Hamburg	0.168066	0.0558397	3.0098	0.0026142	1.18301	1.06005	1.31947
Study center: Bremen	0.214905	0.0496046	4.33236	1.47516e-05	1.23974	1.12476	1.36619
Study center: Kiel	0.107071	0.056051	1.91024	0.0561023	1.11301	0.996878	1.24187
Study center: Neubrandenburg	-0.0150433	0.0457946	-0.328495	0.742538	0.985069	0.900461	1.07754
	Df	Chisq	Pr(>Chisq)
(Intercept)	1	298.198	8.13496e-67
fam_hist_mdd_mv_count	2	459.922	1.34651e-100
basis_age	1	124.148	7.81898e-29
I(basis_age^2)	1	53.1808	3.04221e-13
basis_sex_factor	1	86.6297	1.30869e-20
isced97_level3c_fac	2	375.027	3.66301e-82
StudZ_fac	17	66.2492	9.44275e-08

## Sheet: S7_FH_CTS_any_abuse_fac
	Abuse by FH (number of affected parents)
formula:	CTS_any_abuse_fac ~ fam_hist_mdd_mv_count + basis_age + I(basis_age^2) + basis_sex_factor + isced97_level3c_fac + StudZ_fac
	Estimate	Std. Error	z value	Pr(>|z|)	Odds Ratio (OR)	OR 95% CI Lower	OR 95% CI Higher
(Intercept)	-3.38143	0.207318	-16.3104	8.32977e-60	0.0339987	0.0225941	0.0509282
fam_hist_mdd_mv_countFH one parent positive	0.596364	0.0291746	20.4412	7.19153e-93	1.81551	1.71433	1.92205
fam_hist_mdd_mv_countFH both parents positive	1.33758	0.0635921	21.0338	3.21986e-98	3.80982	3.36125	4.3131
basis_age	0.0660415	0.00790712	8.35215	6.70332e-17	1.06827	1.05192	1.08504
I(basis_age^2)	-0.000550969	7.96918e-05	-6.91374	4.72033e-12	0.999449	0.999292	0.999605
basis_sex_factorfemale	0.423337	0.0250269	16.9152	3.47351e-64	1.52705	1.45405	1.60393
isced97_level3c_facIntermediate	-0.581273	0.0791071	-7.34793	2.01299e-13	0.559186	0.479584	0.654023
isced97_level3c_facHigher	-0.838228	0.0791138	-10.5952	3.1362e-26	0.432476	0.370908	0.505832
Study center: Regensburg	-0.0449532	0.0694555	-0.647224	0.517487	0.956042	0.833648	1.0946
Study center: Mannheim	0.0559388	0.0693692	0.806392	0.420017	1.05753	0.922358	1.21066
Study center: Freiburg	0.179006	0.0653489	2.73924	0.00615808	1.19603	1.05169	1.35882
Study center: Saarbrücken	0.0653093	0.0660331	0.989039	0.322644	1.06749	0.937339	1.21433
Study center: Essen	0.176305	0.0666968	2.64338	0.00820835	1.1928	1.046	1.35863
Study center: Münster	0.0540961	0.0642465	0.842009	0.399783	1.05559	0.930225	1.19669
Study center: Düsseldorf	0.0108748	0.0793231	0.137095	0.890956	1.01093	0.864084	1.17936
Study center: Halle	-0.177172	0.0716506	-2.47272	0.0134088	0.837636	0.727108	0.962972
Study center: Leipzig	-0.0832682	0.0590913	-1.40914	0.158793	0.920104	0.819268	1.03286
Study center: Berlin Nord	-0.0814334	0.0661282	-1.23145	0.218156	0.921794	0.809209	1.04873
Study center: Berlin Mitte	0.165803	0.0600057	2.76312	0.00572523	1.18034	1.04912	1.32738
Study center: Berlin Süd	0.237206	0.0645471	3.67492	0.000237924	1.2677	1.11655	1.43809
Study center: Hannover	0.0690492	0.0654748	1.05459	0.291612	1.07149	0.941905	1.21757
Study center: Hamburg	0.125527	0.0678932	1.84889	0.0644738	1.13375	0.991807	1.2943
Study center: Bremen	0.18297	0.0596799	3.06586	0.00217046	1.20078	1.06798	1.34952
Study center: Kiel	0.0515036	0.0687661	0.748967	0.453877	1.05285	0.919383	1.20391
Study center: Neubrandenburg	-0.290699	0.0592858	-4.90335	9.42181e-07	0.747741	0.665508	0.839654
	Df	Chisq	Pr(>Chisq)
(Intercept)	1	266.028	8.32977e-60
fam_hist_mdd_mv_count	2	773.52	1.07719e-168
basis_age	1	69.7584	6.70332e-17
I(basis_age^2)	1	47.7998	4.72033e-12
basis_sex_factor	1	286.126	3.47351e-64
isced97_level3c_fac	2	187.983	1.51379e-41
StudZ_fac	17	131.636	9.06991e-20

## Sheet: S8_FH_CTS_any_neglect_fac
	Neglect by FH (number of affected parents)
formula:	CTS_any_neglect_fac ~ fam_hist_mdd_mv_count + basis_age + I(basis_age^2) + basis_sex_factor + isced97_level3c_fac + StudZ_fac
	Estimate	Std. Error	z value	Pr(>|z|)	Odds Ratio (OR)	OR 95% CI Lower	OR 95% CI Higher
(Intercept)	-4.84423	0.245012	-19.7714	5.2502e-87	0.00787366	0.00485119	0.0126769
fam_hist_mdd_mv_countFH one parent positive	0.171816	0.0317309	5.41478	6.13625e-08	1.18746	1.11557	1.26334
fam_hist_mdd_mv_countFH both parents positive	0.637037	0.0728626	8.74299	2.27025e-18	1.89087	1.63659	2.17787
basis_age	0.112186	0.00917673	12.225	2.28583e-34	1.11872	1.09892	1.13918
I(basis_age^2)	-0.000726353	8.87955e-05	-8.18007	2.83685e-16	0.999274	0.999099	0.999447
basis_sex_factorfemale	0.00275198	0.0243122	0.113194	0.909877	1.00276	0.956107	1.05171
isced97_level3c_facIntermediate	-0.711524	0.0767389	-9.27201	1.82663e-20	0.490895	0.422836	0.5713
isced97_level3c_facHigher	-1.07619	0.0768821	-13.9979	1.60566e-44	0.340893	0.293547	0.396838
Study center: Regensburg	-0.00925128	0.0691183	-0.133847	0.893523	0.990791	0.864545	1.13367
Study center: Mannheim	0.0532747	0.0699403	0.761718	0.446228	1.05472	0.918826	1.20873
Study center: Freiburg	0.0903525	0.0674844	1.33886	0.180615	1.09456	0.958285	1.24855
Study center: Saarbrücken	-0.0756563	0.0685191	-1.10416	0.269522	0.927135	0.809968	1.05961
Study center: Essen	0.134913	0.0673232	2.00396	0.0450744	1.14444	1.0023	1.30507
Study center: Münster	0.0661017	0.0653495	1.01151	0.311772	1.06834	0.939346	1.21367
Study center: Düsseldorf	0.209758	0.076568	2.73951	0.00615313	1.23338	1.06023	1.43149
Study center: Halle	0.0541065	0.0684728	0.79019	0.429417	1.0556	0.922294	1.20633
Study center: Leipzig	0.0989119	0.0575903	1.71751	0.085886	1.10397	0.985978	1.23573
Study center: Berlin Nord	0.0257876	0.064426	0.400267	0.68896	1.02612	0.903914	1.16367
Study center: Berlin Mitte	0.114972	0.0614359	1.87141	0.0612878	1.12184	0.994229	1.26501
Study center: Berlin Süd	0.0400686	0.0673371	0.595045	0.551814	1.04088	0.911561	1.18699
Study center: Hannover	0.142827	0.0656405	2.17589	0.0295633	1.15353	1.01369	1.31122
Study center: Hamburg	0.150752	0.0676405	2.22872	0.0258323	1.16271	1.01766	1.32673
Study center: Bremen	0.279927	0.060194	4.65041	3.31271e-06	1.32303	1.1755	1.48839
Study center: Kiel	0.174082	0.0670923	2.59466	0.00946834	1.19015	1.04283	1.35662
Study center: Neubrandenburg	0.19629	0.0547467	3.58543	0.000336524	1.21688	1.09306	1.35475
	Df	Chisq	Pr(>Chisq)
(Intercept)	1	390.908	5.2502e-87
fam_hist_mdd_mv_count	2	98.3607	4.3776e-22
basis_age	1	149.451	2.28583e-34
I(basis_age^2)	1	66.9135	2.83685e-16
basis_sex_factor	1	0.0128128	0.909877
isced97_level3c_fac	2	353.161	2.05123e-77
StudZ_fac	17	52.6793	1.60599e-05

## Sheet: S9_FH_AAO_CTS1_Emo_neglect_fac
	Emotional neglect by FH (earliest age at onset)
formula:	CTS1_Emo_neglect_fac ~ CTS_any_neglect_fac + basis_age + I(basis_age^2) + basis_sex_factor + isced97_level3c_fac + StudZ_fac
	Estimate	Std. Error	z value	Pr(>|z|)	Odds Ratio (OR)	OR 95% CI Lower	OR 95% CI Higher
(Intercept)	-6.46979	0.361552	-17.8945	1.30155e-71	0.00154955	0.000755388	0.00311761
fam_hist_mdd_mv_age_facunder 40	0.924892	0.0752812	12.2858	1.07928e-34	2.5216	2.17091	2.91648
fam_hist_mdd_mv_age_fac40 to 59	0.422156	0.0669231	6.30808	2.82522e-10	1.52525	1.3352	1.73588
fam_hist_mdd_mv_age_fac60 or older	0.0850442	0.071049	1.19698	0.231315	1.08877	0.945025	1.24868
fam_hist_mdd_mv_age_facage unknown	1.07365	0.0683328	15.7121	1.24923e-55	2.92605	2.55512	3.34027
basis_age	0.156178	0.0137236	11.3802	5.24802e-30	1.16903	1.13837	1.2013
I(basis_age^2)	-0.00123721	0.000132458	-9.34044	9.59375e-21	0.998764	0.998502	0.99902
basis_sex_factorfemale	0.216429	0.0354416	6.10664	1.01752e-09	1.24163	1.15844	1.33112
isced97_level3c_facIntermediate	-0.945259	0.0914029	-10.3417	4.56491e-25	0.388579	0.325658	0.466077
isced97_level3c_facHigher	-1.30188	0.0919483	-14.1589	1.64654e-45	0.272019	0.227723	0.326611
Study center: Regensburg	-0.0190159	0.0956933	-0.198718	0.842484	0.981164	0.811773	1.18152
Study center: Mannheim	0.0215096	0.0968638	0.22206	0.824267	1.02174	0.843332	1.23311
Study center: Freiburg	-0.0645819	0.0967791	-0.667313	0.504572	0.937459	0.773871	1.13117
Study center: Saarbrücken	-0.0335938	0.093042	-0.36106	0.718055	0.966964	0.80443	1.1587
Study center: Essen	0.109177	0.0926222	1.17874	0.238502	1.11536	0.928724	1.33553
Study center: Münster	-0.0449539	0.0929185	-0.483799	0.628529	0.956042	0.795529	1.14533
Study center: Düsseldorf	0.16274	0.105641	1.5405	0.123438	1.17673	0.953827	1.44361
Study center: Halle	-0.231937	0.104707	-2.21512	0.0267521	0.792996	0.643859	0.970926
Study center: Leipzig	-0.0819996	0.0838588	-0.977829	0.328159	0.921272	0.781016	1.08514
Study center: Berlin Nord	-0.2099	0.0958433	-2.19004	0.0285217	0.810665	0.670467	0.976434
Study center: Berlin Mitte	0.0541165	0.0859148	0.629886	0.528769	1.05561	0.891188	1.24824
Study center: Berlin Süd	0.111738	0.0912319	1.22476	0.220664	1.11822	0.933813	1.33553
Study center: Hannover	0.110625	0.0910316	1.21524	0.224274	1.11698	0.933122	1.3335
Study center: Hamburg	0.0401833	0.0952785	0.421746	0.67321	1.041	0.862061	1.25267
Study center: Bremen	0.29418	0.0815446	3.6076	0.000309039	1.34203	1.14324	1.57403
Study center: Kiel	0.040158	0.0954998	0.420504	0.674118	1.04098	0.861612	1.25311
Study center: Neubrandenburg	-0.282157	0.0849768	-3.3204	0.000898893	0.754155	0.637846	0.890121
	Df	Chisq	Pr(>Chisq)
(Intercept)	1	320.213	1.30155e-71
fam_hist_mdd_mv_age_fac	4	384.775	5.41435e-82
basis_age	1	129.509	5.24802e-30
I(basis_age^2)	1	87.2438	9.59375e-21
basis_sex_factor	1	37.291	1.01752e-09
isced97_level3c_fac	2	251.525	2.40977e-55
StudZ_fac	17	68.6502	3.67823e-08

[truncated: 143 more sheets: S10_FH_AAO_CTS2_Phys_abuse_fac, S11_FH_AAO_CTS3_Emo_abuse_fac, S12_FH_AAO_CTS4_Sex_abuse_fac, S13_FH_AAO_CTS5_Phys_neglect_fa, S14_FH_AAO_CTS_any_maltreatment, S15_FH_AAO_CTS_any_abuse_fac, S16_FH_AAO_CTS_any_neglect_fac, S17_FH_MINI_Criterion_A_C_L2_on, S18_FH_d_an_neu_5_NA_pos_neg, S19_FH_phq9_cutoff10_NA, S20_FH_a_emo_phq9_sum_NA, S21_FH_AAO_MINI_Criterion_A_C_L, S22_FH_AAO_d_an_neu_5_NA_pos_ne, S23_FH_AAO_phq9_cutoff10_NA, S24_FHAAO_a_emo_phq9_sum_NA, S25CTS1_Emo_neglect_facMINI_Cri, S26CTS2_Phys_abuse_facMINI_Crit, S27CTS3_Emo_abuse_facMINI_Crite, S28CTS4_Sex_abuse_facMINI_Crite, S29CTS5_Phys_neglect_facMINI_Cr …]
